# Supplementary material
Source: publisher figshare collection journal article supplement (https://sage.figshare.com/ndownloader/files/12480878)

## Simulation setup

Simulation was conducted under the following settings

1. Markov model where transition rate from state  $i$  to  $j$  at time  $t$ , denoted by  $\alpha_{ij}(t)$ , ( $i = 1, 2$  and  $j = 2, 3$ ), only depends on the patient status at time  $t$ 
  - 1.1 homogeneous time:  $\alpha_{ij}$  is constant over time
  - 1.2 non-homogeneous time:  $\alpha_{ij}$  changes over time
2. Semi-Markov model: transition rate depends on the patient's history prior to transition.

The manuscript included simulation results under the homogeneous time Markov model.

Results from the non-homogeneous Markov and the semi-Markov models were similar to those of homogeneous Markov model, hence, were not included.

In this supplement, we provide additional simulation parameters. Eight combinations of treatment effect on multi-state transitions and the effect of complete remission on subsequent survival were considered in the simulation study.

- Four settings of possible treatment effects on the multi-state transitions (Figure 1S) were investigated. The subscript  $C$  and  $T$  below refer to the control and treatment group, respectively):
  - i)  $\alpha_{ijC} = \alpha_{ijT} \forall i, j$ , (no treatment effects)
  - ii)  $\alpha_{12C} < \alpha_{12T}$ , all other  $\alpha_{ij}$ 's equal between groups, (treatment induces early remission)
  - iii)  $\alpha_{23C} > \alpha_{23T}$ , all other  $\alpha_{ij}$ 's equal between groups (treatment prolongs life after remission)

iv)  $\alpha_{23C} > \alpha_{23T}$  and  $\alpha_{13C} > \alpha_{13T}$ , all other  $\alpha_{ij}$ 's equal between groups (treatment prolongs life both with and without remission)

- For each of the four settings above, two scenarios of remission effect on subsequent survival were evaluated:
  - a)  $\alpha_{12} > \alpha_{13} = \alpha_{23}$  (remission occurs faster than death and achieving a remission has no effect on the risk of death)
  - b)  $\alpha_{12} > \alpha_{13} = \alpha_{23}/1.3$  (remission occurs faster than death and achieving a remission lowers the risk of death)

Note that the effect of remission on mortality was evaluated using the Cox model treating remission as a time-dependent covariate.

Parameters used in the simulation were based on data from CALGB 10603 trial. Specifically,

- The baseline hazard for  $\alpha_{13}, \alpha_{23}$  was set to 0.1.
- We set  $\alpha_{12}$  to four times the baseline for  $\alpha_{13}, \alpha_{23}$  (0.1 prior to multiplication by the relevant hazard ratios (HR)). This  $\alpha_{12}$  was chosen so that on average, 80 % of the patients would achieve complete remission.
- A difference (corresponding to the inequalities in the scenarios above) was defined as a hazard ratio of 1.3.
- The maximum time for the restricted means is set to 48.
- Sample size was 250 people per group (500 total).
- Censoring times were independent of failure times and set to follow an exponential distribution (20% censoring at the end of study).

- 1000 simulations were run per scenario.

Figure 1S shows the plots of probability-in-state for the eight simulated scenarios. Each panel represents a treatment effect scenario corresponding to scenarios i) – iv) listed above. Each panel includes the curves representing the effect of remission on subsequent survival corresponding to scenarios a) and b) listed above.

Figure 1S. Probability-in-state curves of the eight simulated scenarios

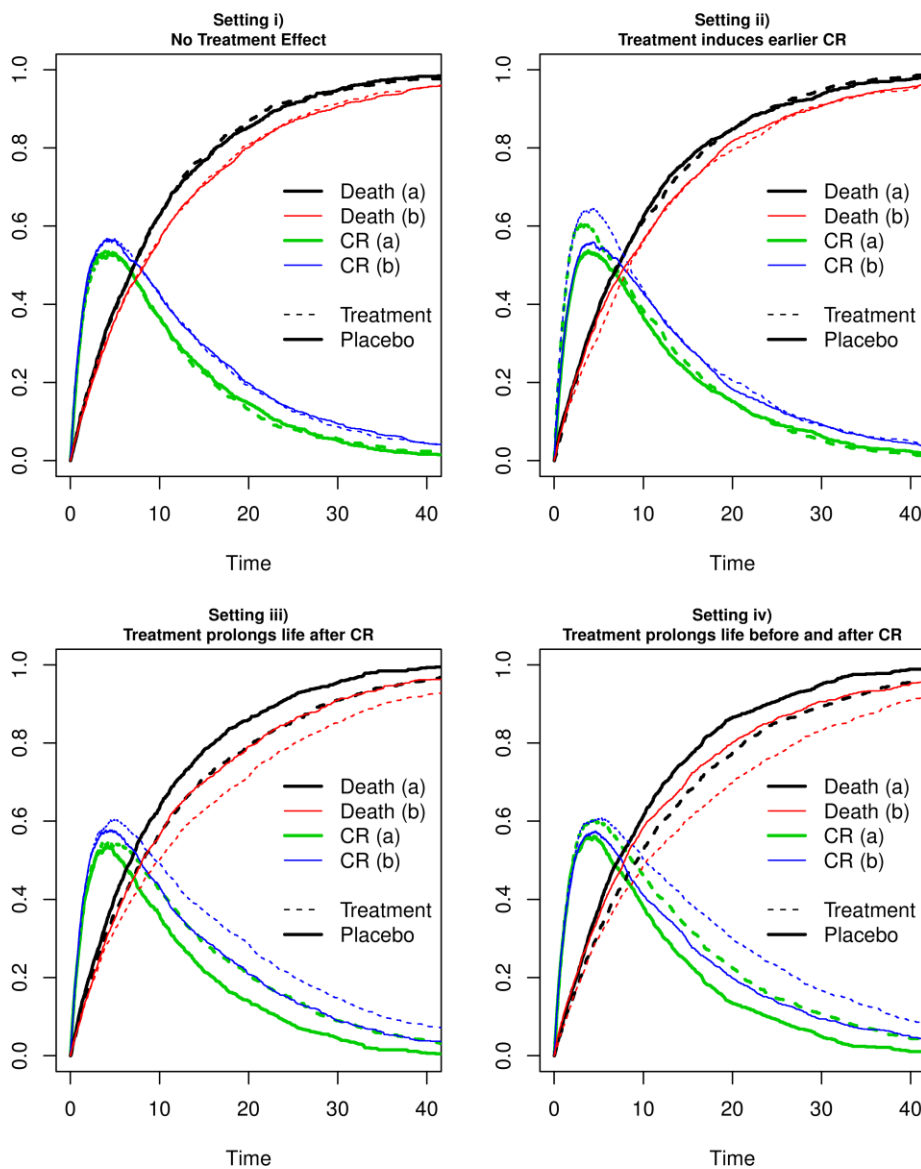

Supplement: Supplementary file 1 [file 12480878]
